# Supplementary material for: Nitric oxide releasing coatings for the prevention of viral and bacterial infections
Source: Royal Society of Chemistry journal article supplement (doi:10.1039/d4bm00172a), 2024-01-01
Supplement: d4bm00172a1.pdf [file d4bm00172a1.pdf]

## **Nitric Oxide Releasing Coatings for the Prevention of Viral and Bacterial Infections**

Jenny Aveyard,<sup>1</sup> Siobhan Richards,<sup>2</sup> Man Li,<sup>1</sup> Graeme Pitt,<sup>1</sup> Grant L Hughes<sup>2</sup>, Asangaedem Akpan<sup>3,4</sup> Riaz Akhtar,<sup>1</sup> Ahmed Kazaili<sup>5</sup> and Raechelle A D'Sa<sup>1\*</sup>

<sup>1</sup>. School of Engineering, University of Liverpool, Harrison Hughes Building, Brownlow Hill, Liverpool, L69 3GH, UK

<sup>2</sup>. Departments of Vector Biology and Tropical Disease Biology, Centre for Neglected Tropical Disease, Liverpool School of Tropical Medicine, Pembroke Place, Liverpool, L3 5QA, UK

<sup>3</sup>. Department of Musculoskeletal & Ageing Sciences, University of Liverpool, Liverpool L69 3GL, UK,

<sup>4</sup>. Liverpool University Hospitals NHS FT, Liverpool L7 8XP, UK

<sup>5</sup>Department of Biochemistry & Systems Biology, University of Liverpool, Liverpool, L69 7ZB

Supplementary Information

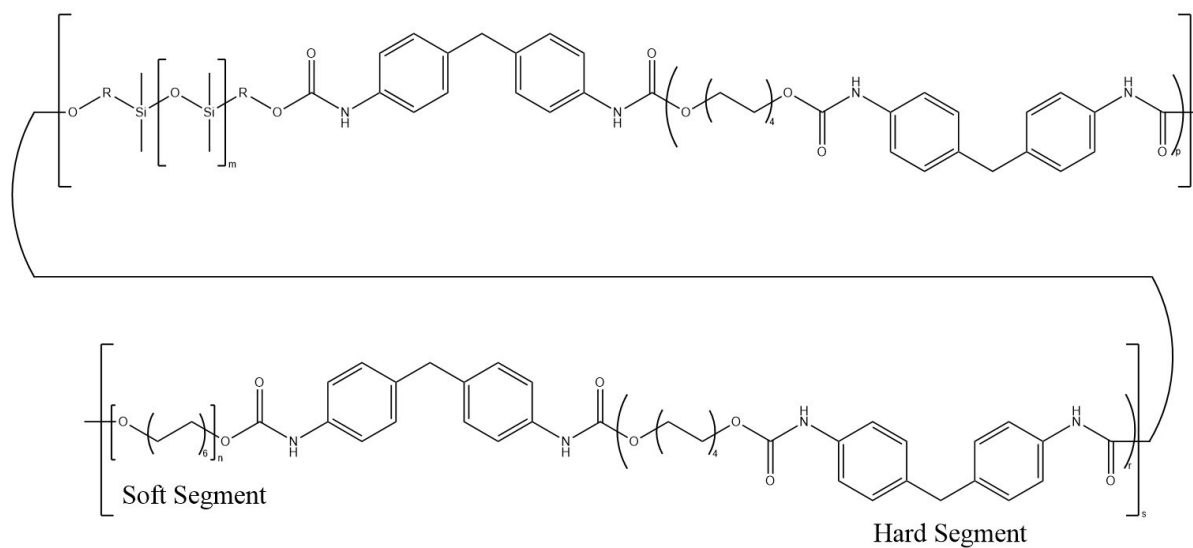

Figure S1: The structure of Elast-Eon type polymers. Elast-Eon is a urethane-silicone elastomer with a 40% hard segment content and a mixed polyether/siloxane soft segment. Structure taken from Gunatillake, P. A., Dandeniya, L. S., Adhikari, R., Bown, M., Shanks, R., & Adhikari, B. (2019). Advancements in the Development of Biostable Polyurethanes. *Polymer Reviews*, 59(3), 391–417. <https://doi.org/10.1080/15583724.2018.1493694>

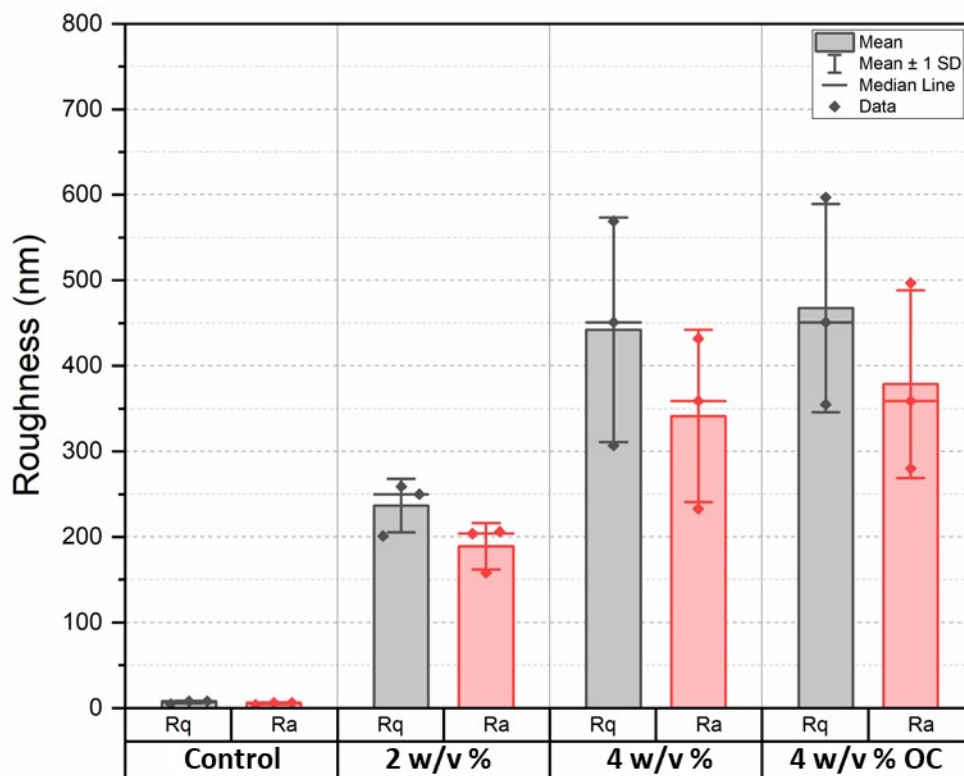

Figure S2: Graph detailing Rq/Ra results obtained from AFM measurement of SNAP coated substrates. As the concentration of SNAP increases, the roughness increases. The surface roughness of the substrates with a polymer overcoat is not significantly different to the 4 w/v% coated substrate, indicating that there is a thin layer of E2As applied to the surface.

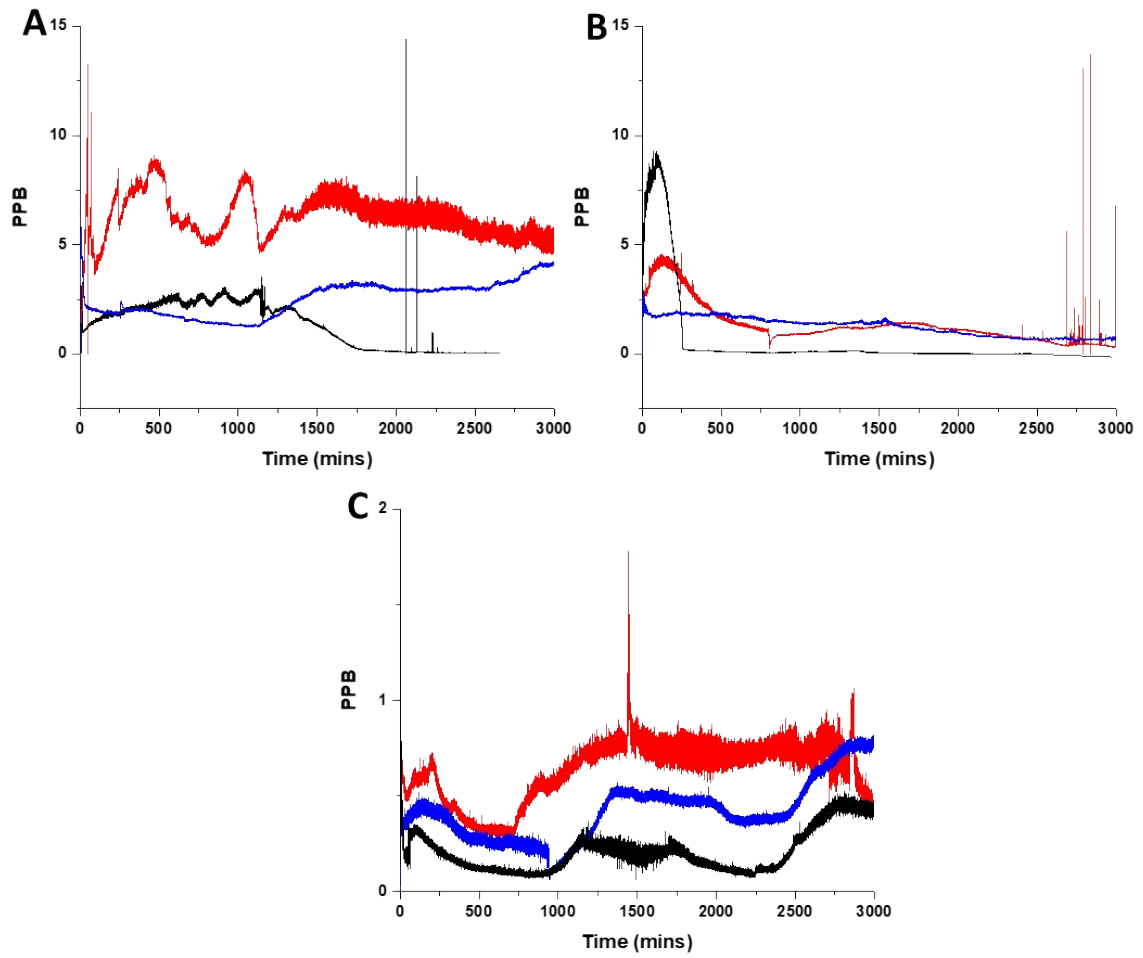

Figure S3: Representative chemiluminescence graphs of SNAP coated substrates in A) PBS B) DMEM C) LB Broth. Black= 2 w/v %; Blue = 4 w/v % OC; Red= 4 w/v %.

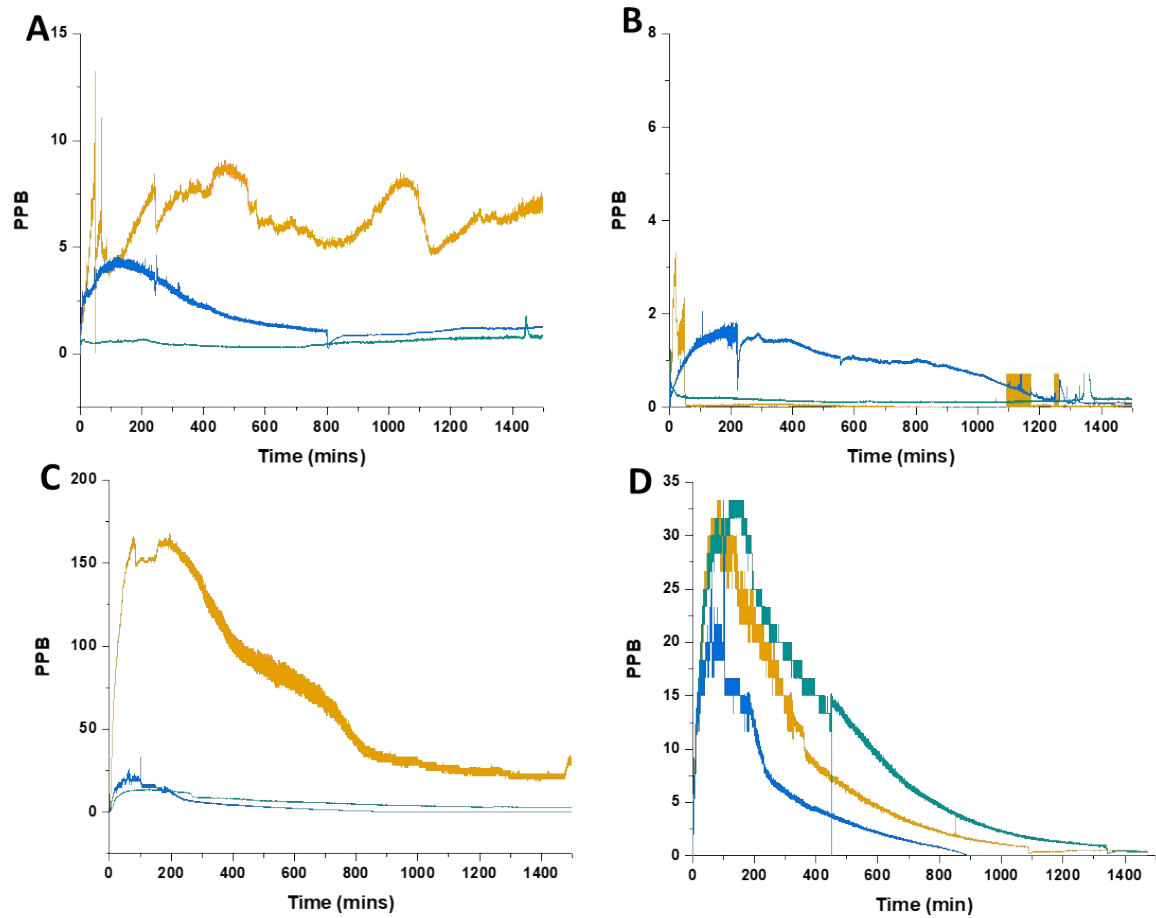

Figure S4: Representative chemiluminescence graphs of 4 w/v % SNAP coated substrates. A) Dark without EDTA B) Dark with EDTA C) Light without EDTA D) Light with EDTA. Orange= PBS; Blue = DMEM; Green= LB broth

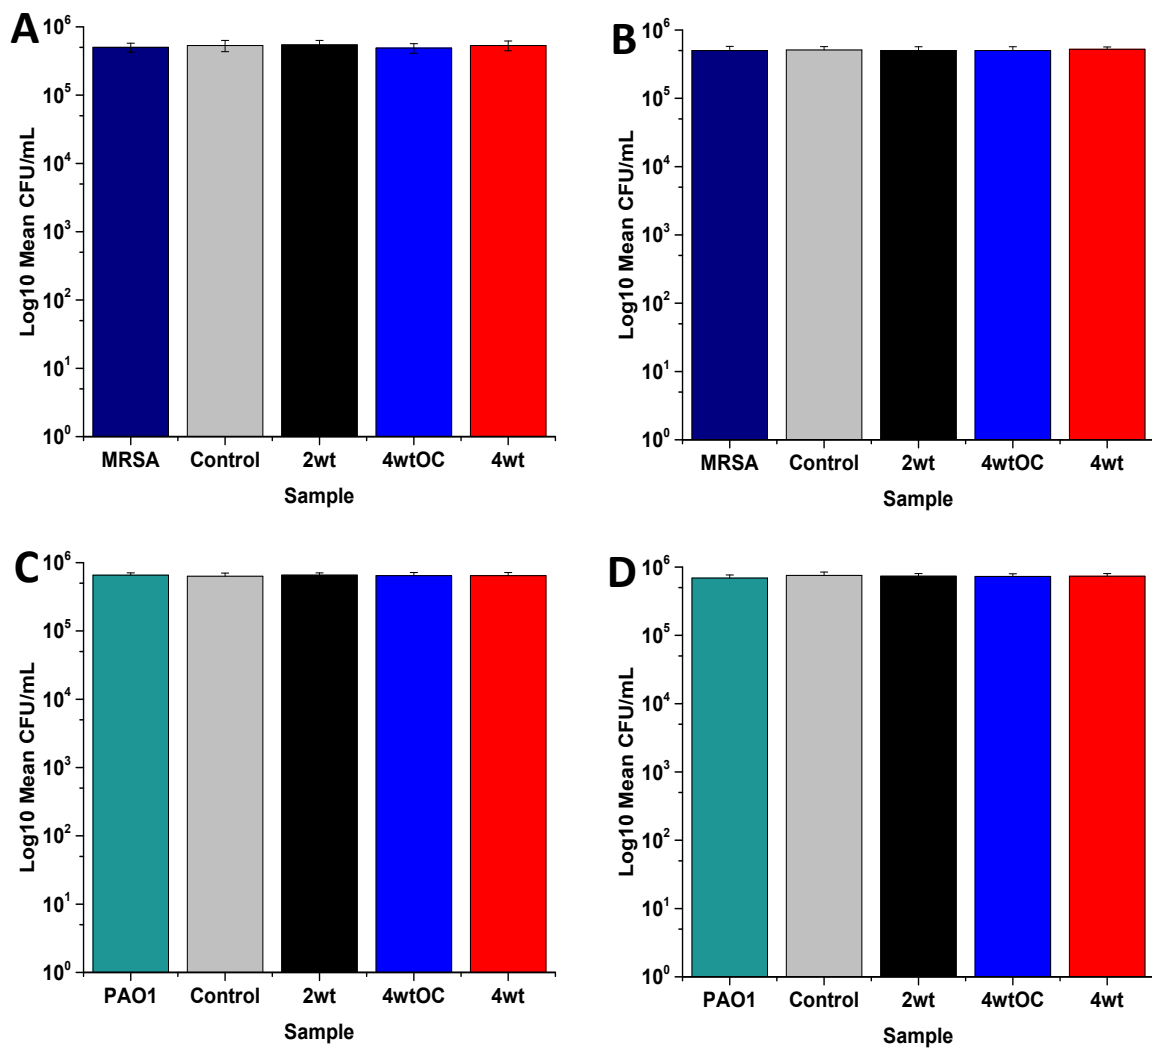

Figure S5: Antibacterial efficacy of NO releasing polymer surfaces in planktonic assays against MRSA (A and B) and PAO1 (C and D) under nutrient poor conditions (PBS) after 1 (A, C) and 2 hours (B, D) incubation. Values represent mean  $\pm$  SD (n=3). There was no antibacterial activity observed with either bacteria at 1 or 2 hours with any samples tested.
